# Supplementary material
Source: MDPI journal article supplement (https://www.mdpi.com/2073-4395/13/3/864)
Supplement: s1 [file s1]

# Effects of Priming Rice Seeds with Decoyinine on Fitness Traits and Virus Transmission Ability of the Small Brown Planthopper, *Laodelphax striatellus*

Amir Zaman Shah<sup>1</sup>, Yuanyuan Zhang<sup>1</sup>, Wei Gui<sup>1</sup>, Ming Shi Qian<sup>1</sup>, Youxin Yu<sup>1</sup>, Gang Xu<sup>1,2,3\*</sup> and Guoqing Yang<sup>1,2,3\*</sup>

<sup>1</sup> College of Plant Protection, Yangzhou University, Yangzhou 225009, China

<sup>2</sup> Jiangsu Co-Innovation Center for Modern Production Technology of Grain Crops, Yangzhou University, Yangzhou, China

<sup>3</sup> Joint International Research Laboratory of Agriculture and Agri-Product Safety, the Ministry of Education of China, Yangzhou University, Yangzhou, China

\*Correspondence: gqyang@yzu.edu.cn (G.-Q. Y), xugang@yzu.edu.cn (G. X.)

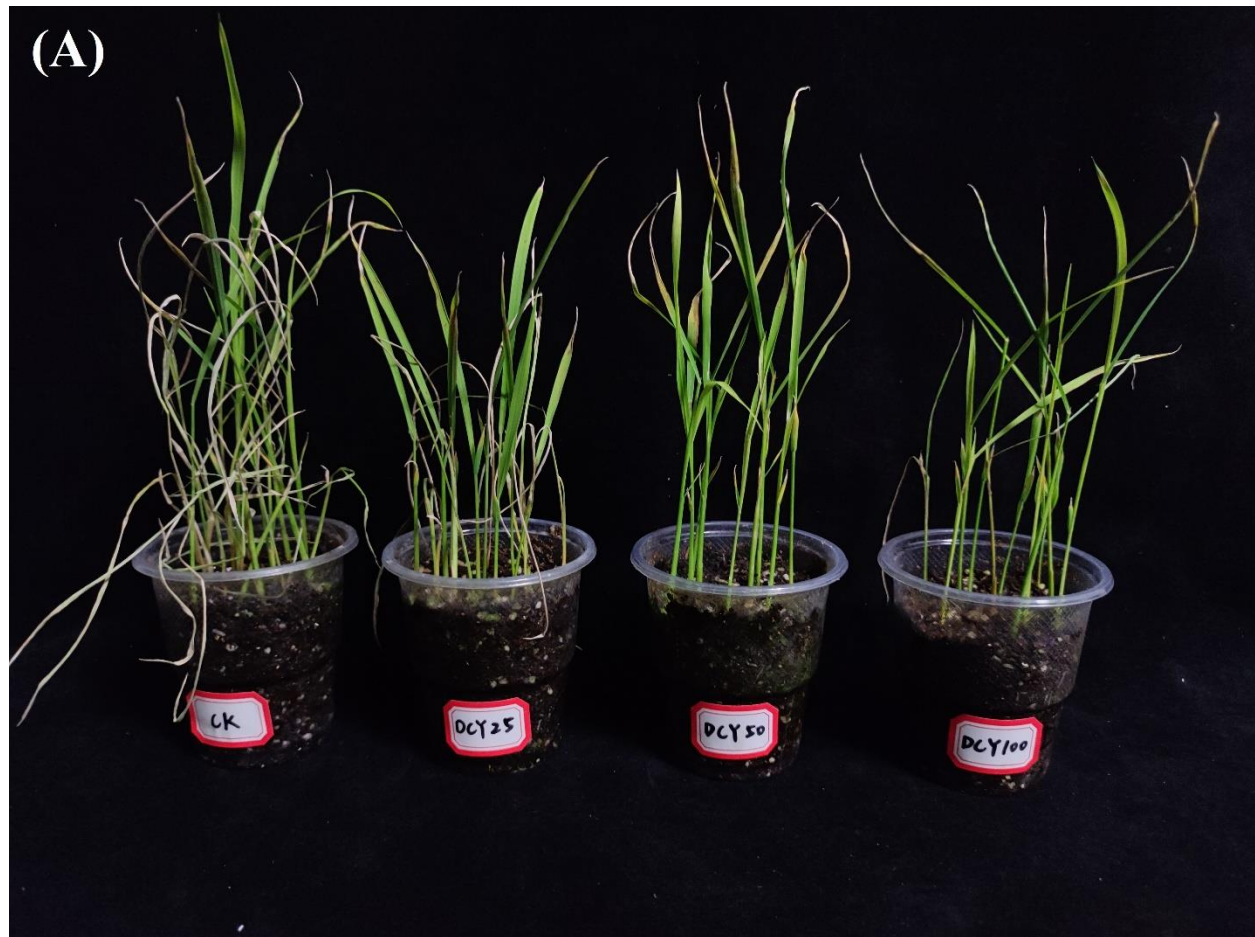

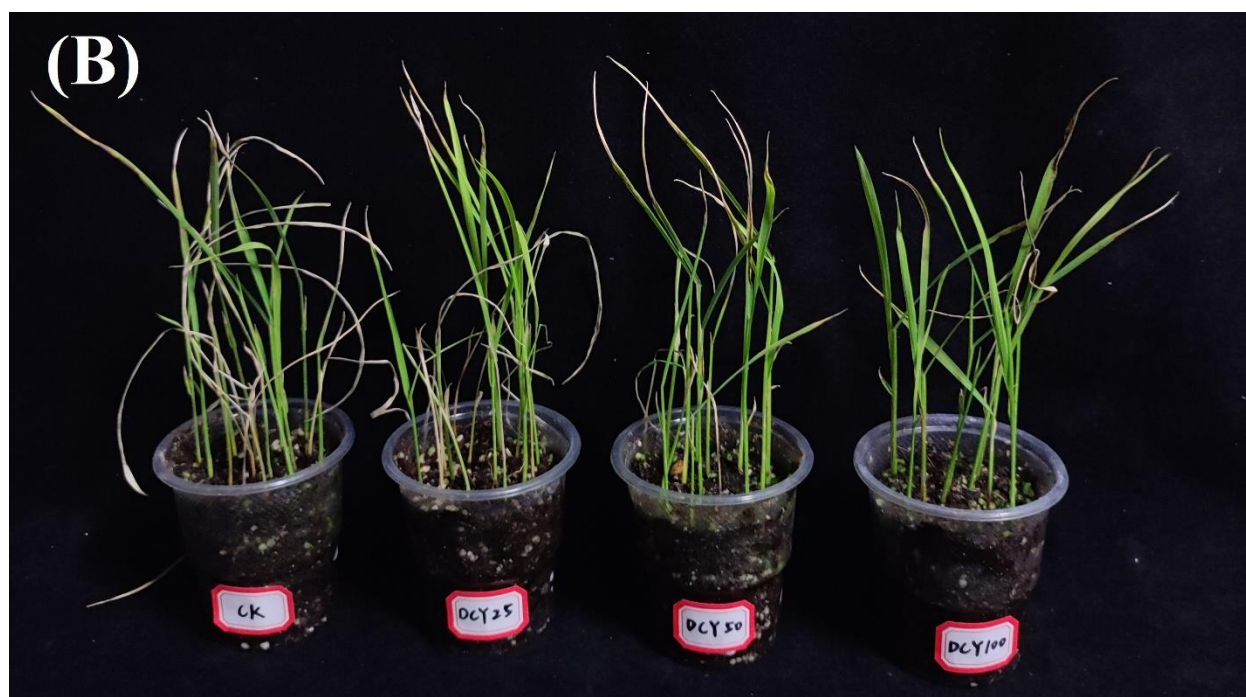

**Figure S1.** (A) Rice seedlings after Non-RSV SBPH feeding, the label represents different concentrations of DCY. (B) Rice seedlings after RSV SBPH feeding, the label represents different concentrations of DCY.

**Table S1.** Two-way analysis of variance for biological parameters of SBPH fed on DCY-treated rice under laboratory conditions.

| Biological Parameters |                     | df  | Mean Square | F       | P      |
|-----------------------|---------------------|-----|-------------|---------|--------|
| Female Body weight    | SBPH (A)            | 1   | 0.380       | 29.059  | <0.001 |
|                       | DCY treatment (B)   | 3   | 1.174       | 89.749  | <0.001 |
|                       | Interaction (A×B)   | 3   | 0.042       | 3.241   | 0.024  |
|                       | Error               | 152 | 0.013       |         |        |
| Male Body weight      | SBPH (A)            | 1   | 0.039       | 4.079   | 0.045  |
|                       | DCY treatment (B)   | 3   | 0.981       | 102.471 | <0.001 |
|                       | Interaction (A×B)   | 3   | 0.045       | 4.671   | 0.004  |
|                       | Error               | 152 | 0.010       |         |        |
| Honeydew weight       | SBPH (A)            | 1   | 0.156       | 20.981  | <0.001 |
|                       | DCY treatment (B)   | 3   | 0.362       | 48.619  | <0.001 |
|                       | Interaction (A × B) | 3   | 0.010       | 1.309   | 0.274  |
|                       | Error               | 152 | 0.007       |         |        |
| Fecundity             | SBPH (A)            | 1   | 11645.156   | 338.901 | <0.001 |
|                       | DCY treatment (B)   | 3   | 16362.440   | 476.185 | <0.001 |
|                       | Interaction (A × B) | 3   | 1290.506    | 37.557  | <0.001 |
|                       | Error               | 152 | 34.362      |         |        |
| Nymphal Survival      | SBPH (A)            | 1   | 2738.000    | 27.797  | <0.001 |
|                       | DCY treatment (B)   | 3   | 246.000     | 2.497   | 0.061  |
|                       | Interaction (A × B) | 3   | 56.667      | 0.575   | 0.632  |
|                       | Error               | 192 | 98.5        |         |        |

SBPH feeding on DCY treatment (0, 25, 50, and 100 mg DCY L<sup>-1</sup>) water solution. Significant differences at  $P < 0.05$  by using Tukey's HSD test.
